# Supplementary material for: Expression-based clustering of CAZyme-encoding genes of Aspergillus niger
Source: PubMed Central journal article supplement (PMC5701360; doi:10.1186/s12864-017-4164-x), 2017-11-23
Supplement: 12864_2017_4164_MOESM1_ESM.pdf [file 12864_2017_4164_MOESM1_ESM.pdf]

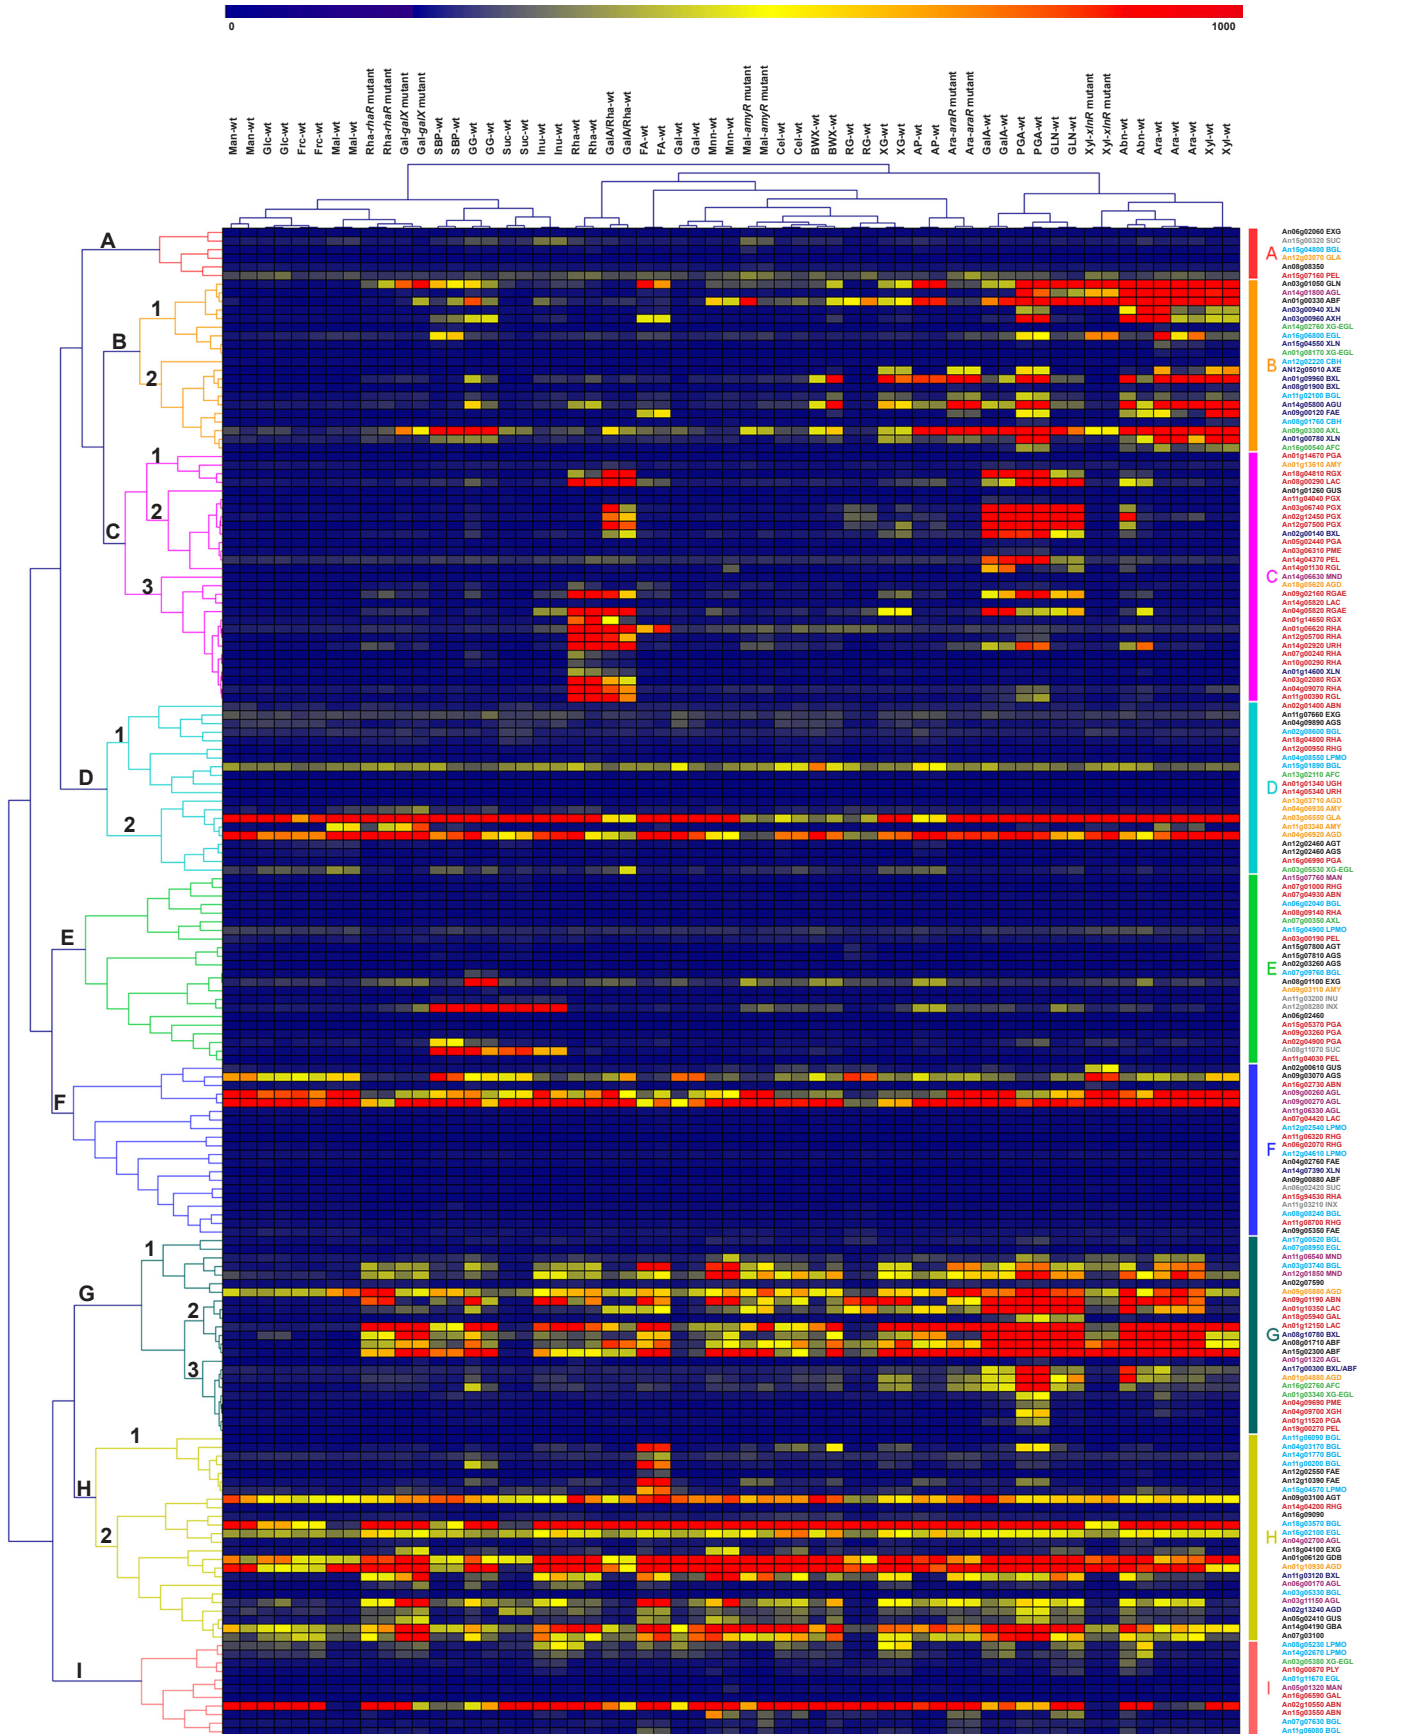

**Additional File 1. Expression profiling tree containing 168 genes encoding selected CAZymes resulting in nine main clusters (A-I).** The enzymatic function of the genes is depicted by a three-letter code (see Additional File 3 for explanation of the codes). Color-coding of the genes reflects the substrate they are expected to act on. Light blue = cellulose, dark blue = xylan, orange = starch, grey = inulin, red = pectin, green = xyloglucan, purple = galactomannan. Substrates A. niger was grown on are listed above the figure. Man = D-mannose, Glc = D-glucose, Frc = D-fructose, Mal = maltose, Rha = L-rhamnose, SBP = sugar beet pulp, GG = guar gum, Suc = sucrose, Inu = inulin, GalA/Rha = mixture of D-galacturonic acid and L-rhamnose, FA = ferulic acid, Gal = D-galactose, Mnn = mannan, Cel = cellulose, BWX = beechwood xylan, RG = rhamnogalacturonan I, XG = xyloglucan, AP = apple pectin, Ara = L-arabinose, GalA = D-galacturonic acid, PGA = polygalacturonic acid, GLN = galactan, Xyl = D-xylose, Abn = arabinan. wt = wild type.
